# Supplementary material for: Binaphthyl-incorporated π-conjugated polymer/gold nanoparticle hybrids: a facile size- and shape-tailored synthesis
Source: Royal Society of Chemistry journal article supplement (doi:10.1039/c6ra22234j), 2016-01-01
Supplement: c6ra22234j1.pdf [file c6ra22234j1.pdf]

*Electronic Supplementary Information for*

**Binaphthyl-incorporated  $\pi$ -conjugated polymer/gold  
nanoparticles hybrids: A facile size- and shape-tailored synthesis**

*Sun Gu Song,<sup>a</sup> Seonggyun Ha,<sup>a</sup> Kyeong-Bae Seo,<sup>b</sup> Jookyung Lee,<sup>a</sup> Tae-Lim Choi,<sup>b</sup> Thathan  
Premkumar,<sup>\*a, c</sup> and Changsik Song<sup>\*a</sup>*

<sup>a</sup>Department of Chemistry, Sungkyunkwan University, Seobu-ro 2066, Jangan-gu, Suwon-si, Gyeonggi-do, 16419, Republic of Korea. <sup>b</sup>Department of Chemistry, Seoul National University, Gwanak-ro 1, Seoul 08826, Republic of Korea. <sup>c</sup>University College, Sungkyunkwan University, Seobu-ro 2066, Jangan-gu, Suwon-si, Gyeonggi-do, 16419, Republic of Korea

\*E-mail: T.P: [tprem@skku.edu](mailto:tprem@skku.edu); C.S: [songcs@skku.edu](mailto:songcs@skku.edu)

## Table of Contents

|                |                                                                                                 |           |
|----------------|-------------------------------------------------------------------------------------------------|-----------|
| <b>Fig. S1</b> | <b>SEM images of PBNT/AuNP hybrids</b> -----                                                    | <b>S2</b> |
| <b>Fig. S2</b> | <b>TEM images of PBNT2/AuNPs prepared in toluene with triangular or hexagonal shapes.</b> ----- | <b>S3</b> |
| <b>Fig. S3</b> | <b>Time dependent TEM images of PBNT2/AuNP hybrids</b> -----                                    | <b>S4</b> |

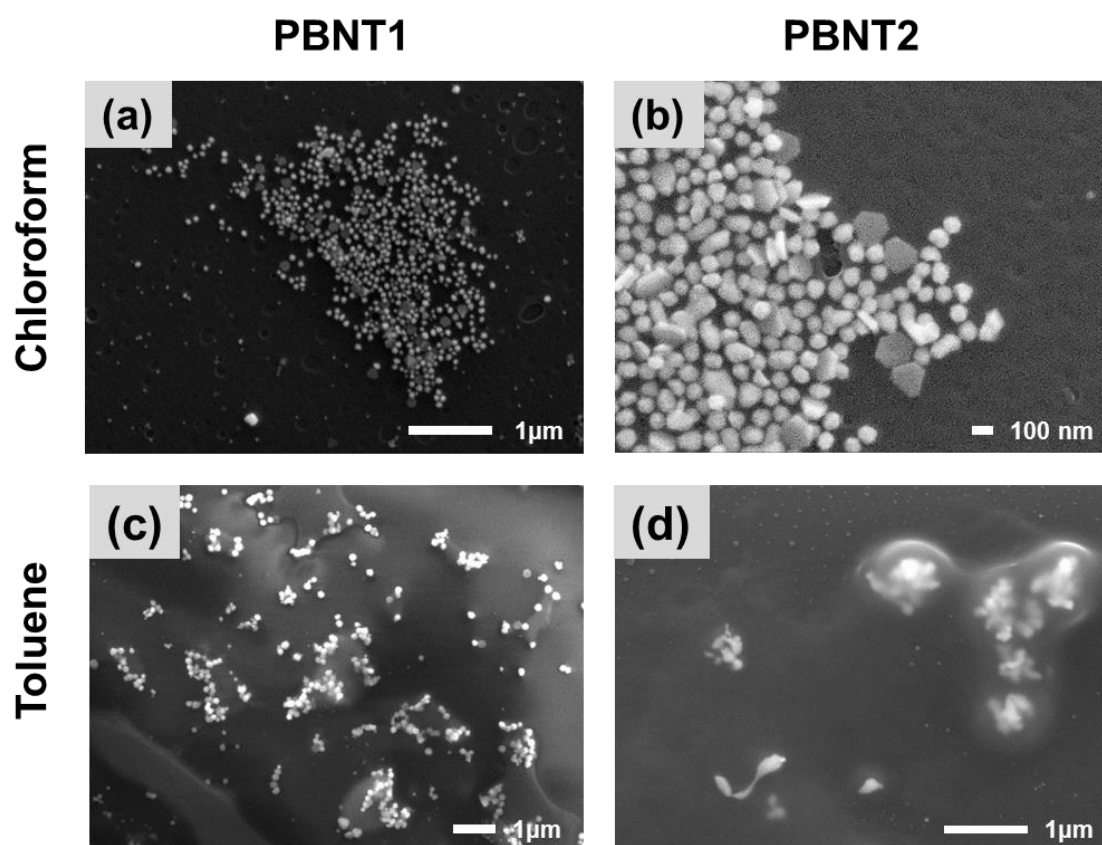

**Fig. S1** SEM images of PBNT/AuNP nanocomposites synthesized in  $\text{CHCl}_3$  with (a) PBNT1 and (b) PBNT2. PBNT/AuNP synthesized in toluene with (c) PBNT1 and (d) PBNT2.

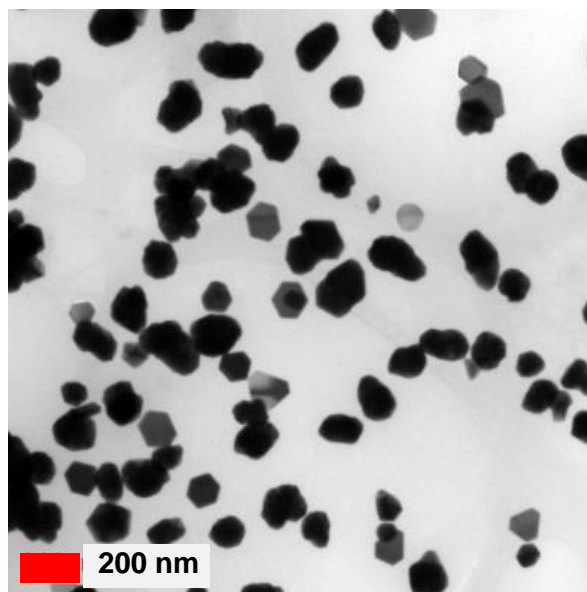

**Fig. S2** TEM images of PBNT2/AuNPs prepared in toluene with triangular or hexagonal shapes.

**Time dependent PBNT2/AuNP growth in toluene**

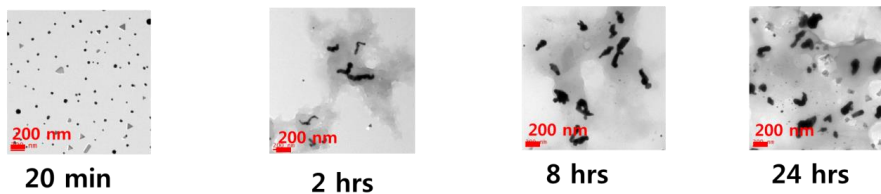

**Time dependent PBNT2/AuNP growth in chloroform**

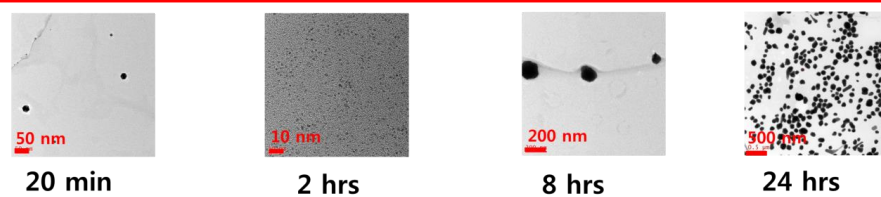

**Fig. S3** TEM images of PBNT2/AuNP nanocomposites by the reaction time.
